# Supplementary material for: Can we obtain consistent estimates of the emissions in Europe from three different CH 4 TROPOMI products?
Source: Copernicus journal article supplement (doi:10.5194/egusphere-2025-2622), 2025-07-04
Supplement: Supplementary file 1 [file egusphere-2025-2622-supplement.pdf]

# Supplement to “Can we obtain consistent estimates of the emissions in Europe from three different CH<sub>4</sub> TROPOMI products?” by Aurélien Sicsik-Paré *et al.*

| Country        | Prior (Tg/yr) | Posterior SRON (Tg/yr) | BLENDED (Tg/yr) | WFMD (Tg/yr) | Surface (Tg/yr) |
|----------------|---------------|------------------------|-----------------|--------------|-----------------|
| Germany        | 2.74          | 3.02 (+10%)            | 3.02 (+10%)     | 2.25 (-18%)  | 3.27 (+20%)     |
| France         | 2.60          | 2.72 (+4%)             | 2.69 (+3%)      | 1.83 (-30%)  | 2.23 (-14%)     |
| Poland         | 2.55          | 2.64 (+4%)             | 2.47 (-3%)      | 1.45 (-43%)  | 2.42 (-5%)      |
| Italy          | 2.45          | 2.32 (-5%)             | 2.22 (-9%)      | 1.09 (-56%)  | 1.13 (-54%)     |
| United Kingdom | 2.03          | 2.24 (+10%)            | 2.20 (+8%)      | 1.78 (-12%)  | 1.70 (-16%)     |
| Romania        | 1.58          | 1.38 (-13%)            | 1.27 (-19%)     | 0.45 (-72%)  | 1.27 (-20%)     |
| Spain          | 1.56          | 1.52 (-3%)             | 1.34 (-14%)     | 0.89 (-43%)  | 1.49 (-4%)      |
| Finland        | 1.05          | 1.00 (-5%)             | 1.07 (+1%)      | 0.98 (-7%)   | 0.82 (-22%)     |
| Sweden         | 0.94          | 0.92 (-3%)             | 0.96 (+1%)      | 0.89 (-6%)   | 0.78 (-17%)     |
| Belgium        | 0.74          | 0.78 (+5%)             | 0.80 (+9%)      | 0.47 (-37%)  | 0.80 (+9%)      |
| Ireland        | 0.74          | 0.79 (+7%)             | 0.77 (+4%)      | 0.67 (-9%)   | 0.43 (-41%)     |
| Netherlands    | 0.66          | 0.75 (+13%)            | 0.77 (+17%)     | 0.51 (-22%)  | 1.27 (+92%)     |
| Norway         | 0.56          | 0.55 (-2%)             | 0.57 (+1%)      | 0.55 (-2%)   | 0.48 (-14%)     |
| Czech Republic | 0.50          | 0.55 (+10%)            | 0.50 (0%)       | 0.30 (-40%)  | 0.58 (+17%)     |
| Austria        | 0.46          | 0.51 (+11%)            | 0.47 (+2%)      | 0.35 (-24%)  | 0.48 (+5%)      |

**Table S1.** Prior, posterior CH<sub>4</sub> emissions and the relative increments per country, for the 15 highest emitting countries and the four inversions performed in this study.

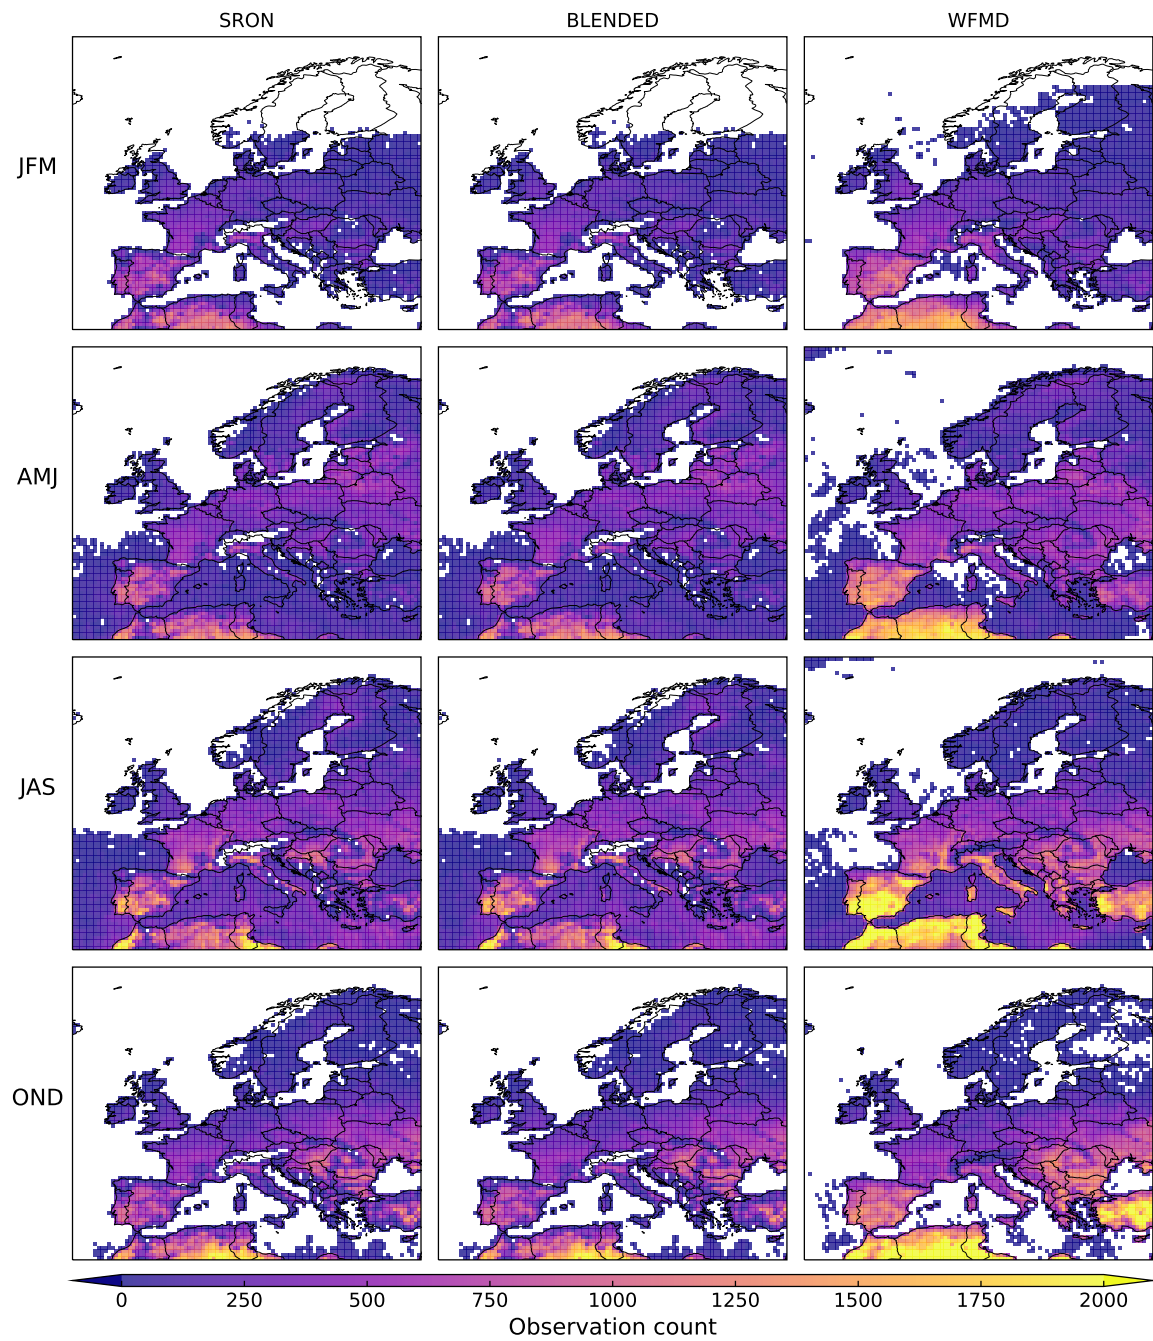

**Figure S1.** Seasonal maps of the spatial density of observations. The three columns correspond to the SRON, BLENDED and WFMD products, while the rows correspond to the seasons.

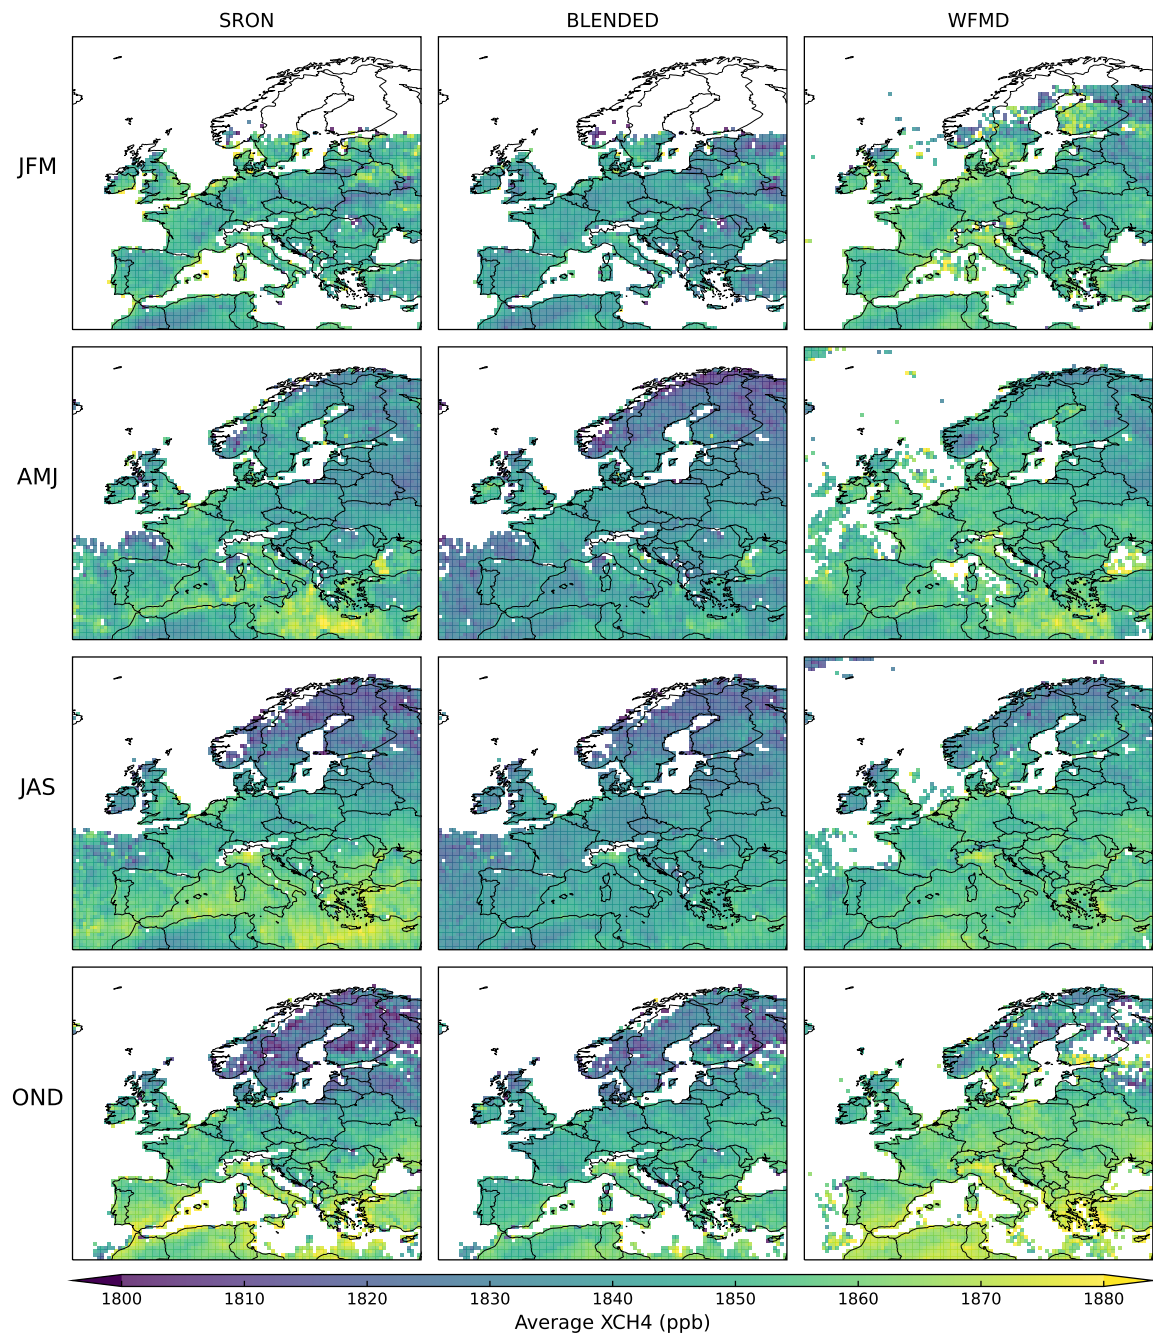

**Figure S2.** Seasonal average TROPOMI observations (in ppb) for the 3 products.

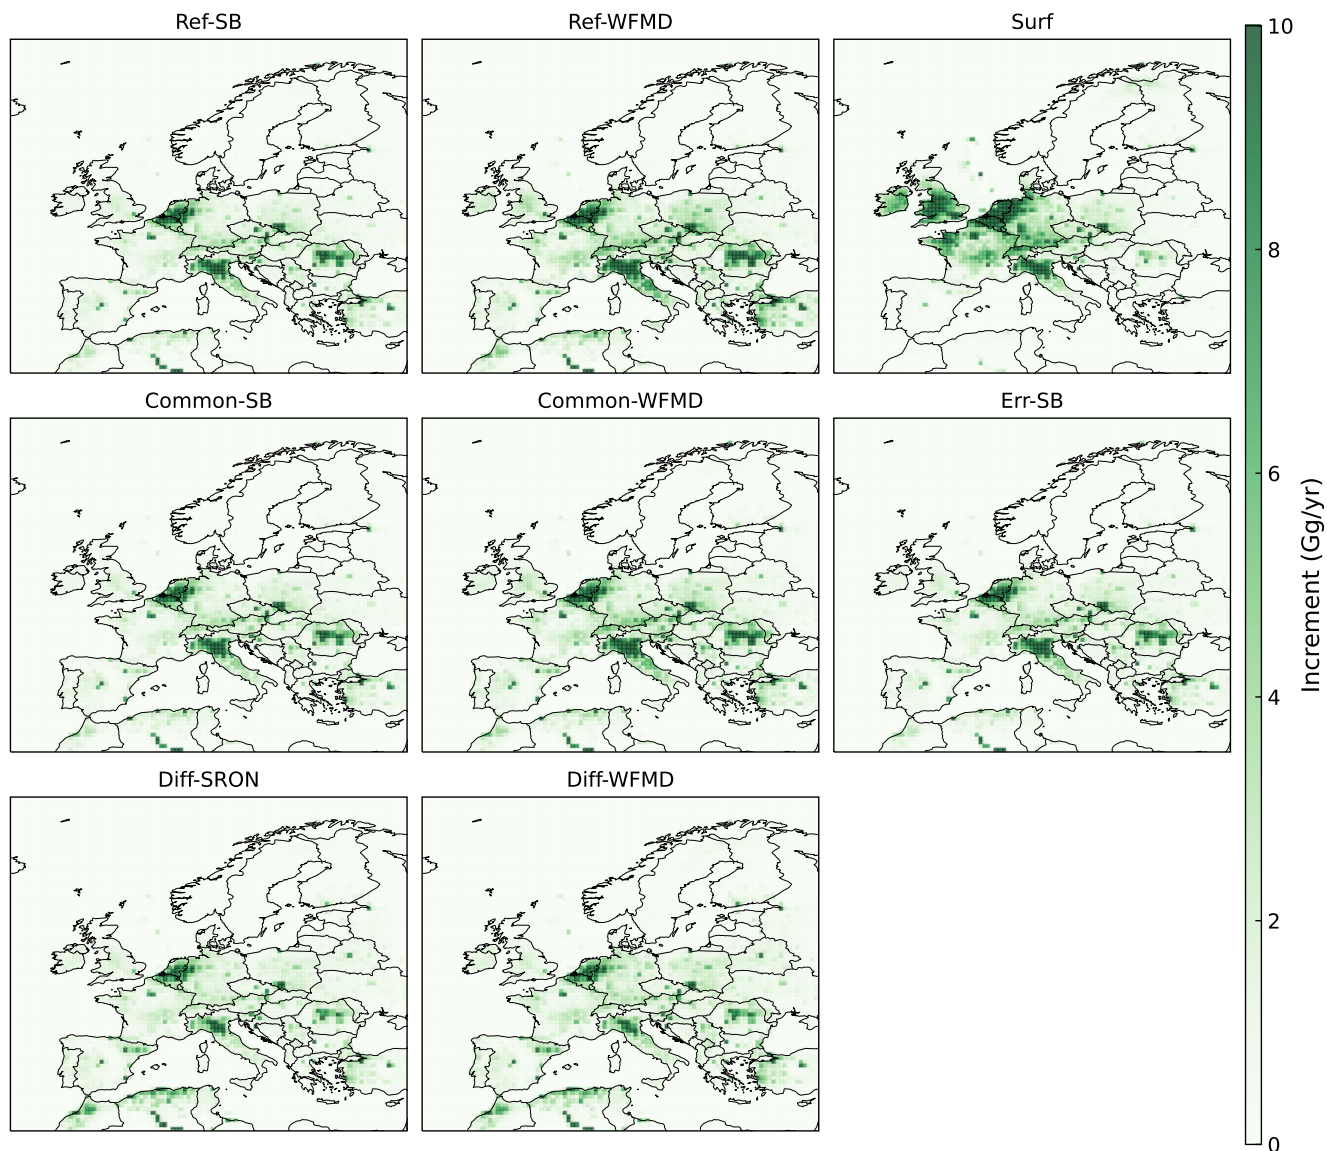

**Figure S3.** Spatial average of the absolute values of the increments ( $|\text{posterior} - \text{prior}|$ ) for all OSSE scenarios.



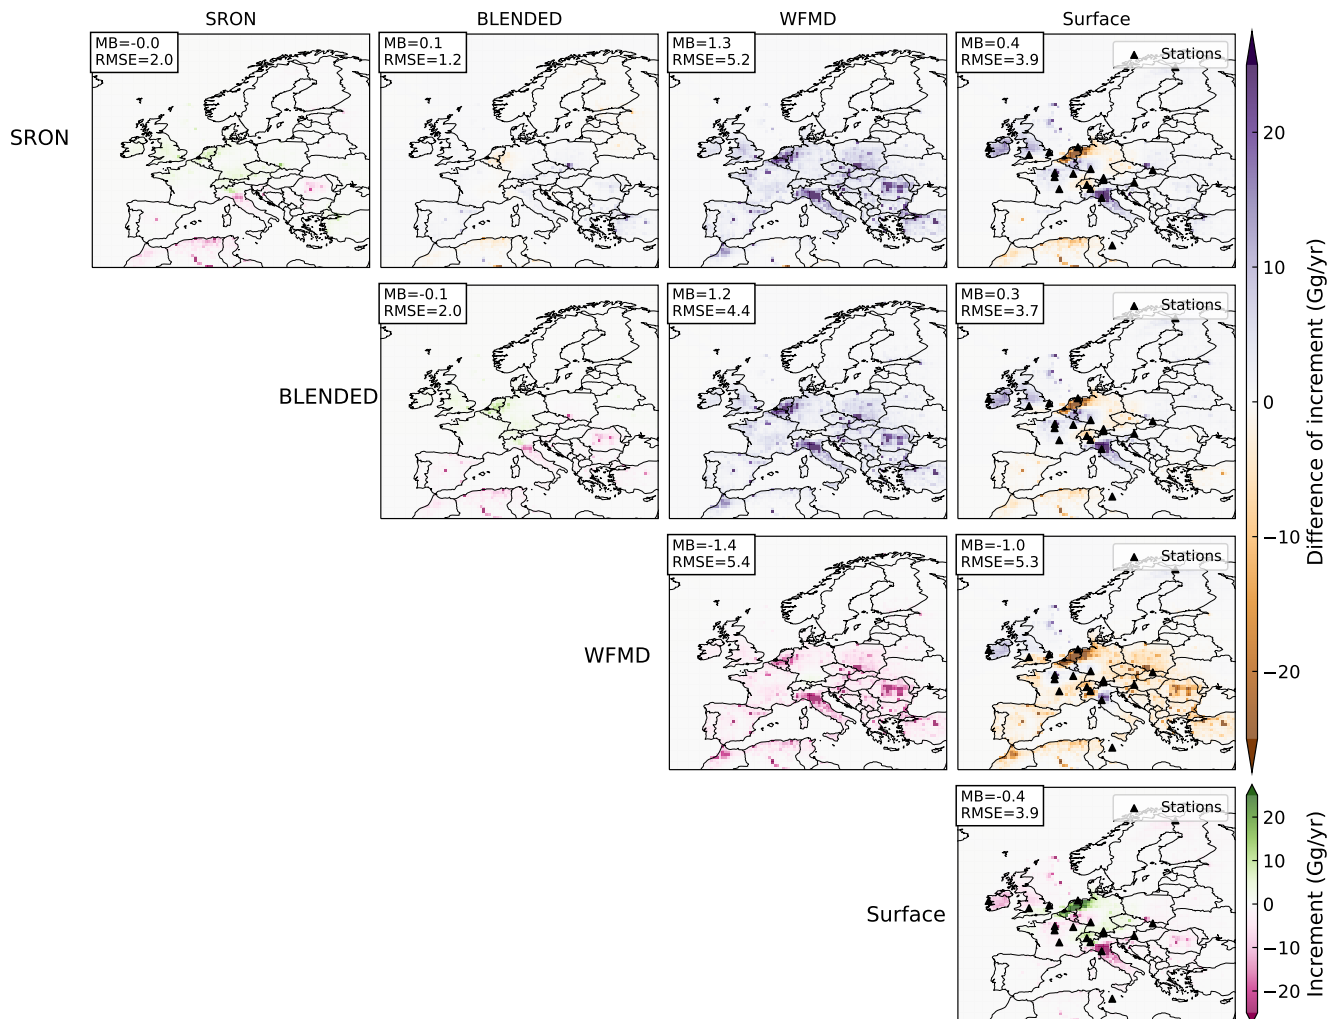

**Figure S4.** Matrix of the increment maps detailed in Section 3.3. The diagonal maps show the increments as in Figure 10a, while the non-diagonal maps show the difference between the increments derived from the inversions based on the product of the corresponding row and the corresponding column. MB and RMSE are in Gg/yr.
